# Supplementary material
Source: PubMed Central journal article supplement (PMC4128859)
Supplement: cbt-15-1163-s01.pdf [file cbt-15-1163-s01.pdf]

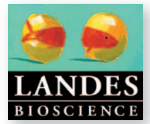

## **Supplemental Material to:**

**Yi Sun, Yulong Shang, Gui Ren, Lin Zhou, Bin Feng, Kai Li,  
Lin Deng, Jie Liang, Yuanyuan Lu, and Xin Wang**

**Coronin3 regulates gastric cancer invasion and metastasis  
by interacting with Arp2**

**Cancer Biology & Therapy 2014; 15(9)  
<http://dx.doi.org/10.4161/cbt.29501>**

**<http://www.landesbioscience.com/journals/cbt/article/29501/>**

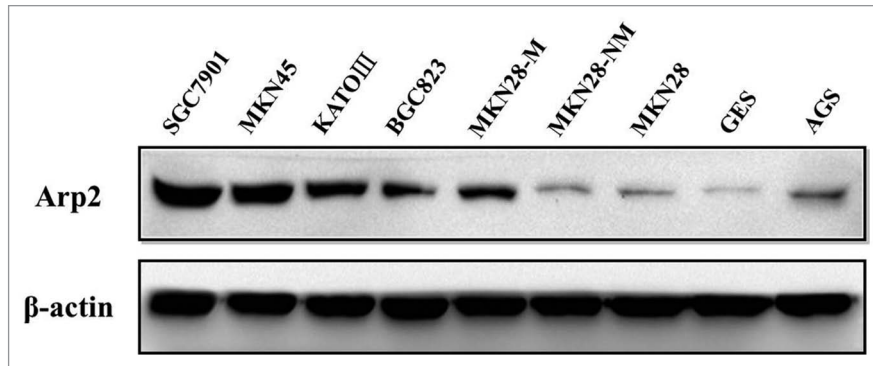

**Figure S1.** The expression levels of Arp2 in multiple gastric cancer cell lines. The expression levels of Arp2 were examined by western blotting in 8 gastric cancer cell lines and the immortalized gastric epithelial cells (GES). Arp2 was upregulated in all gastric cancer cell lines compared with GES. In particular, the expression level of Arp2 was significantly upregulated in MKN28-M cells in comparison with MKN28-NM cell line.

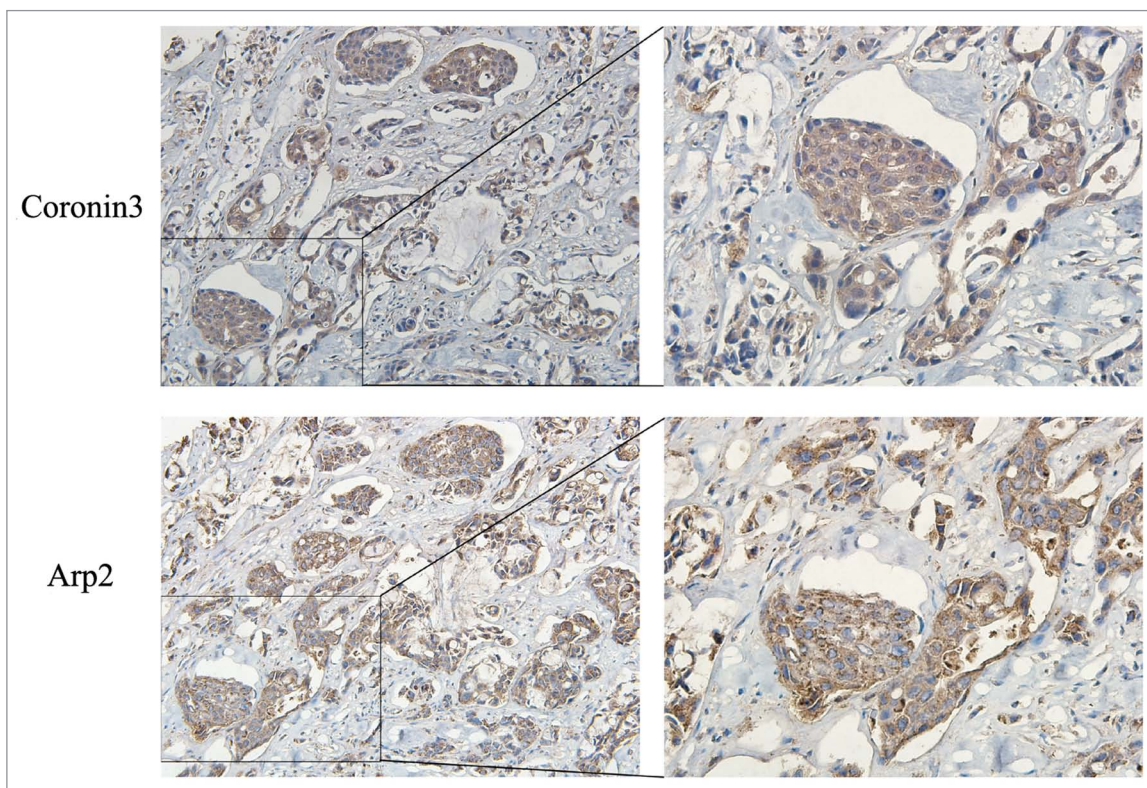

**Figure S2.** The expression pattern of Coronin3 and Arp2 in gastric cancer tissues. Serial sections of gastric cancer tissues were employed to detect Coronin3 and Arp2 by immunohistochemistry. The cellular location of Coronin3 and Arp2 were similar and they were both localized in the cytoplasm. Images of left panel, 200x; right panel, 400x.
